# Supplementary material for: Ene cyclisations of α-(prenyl)dialkylsilyloxy aldehydes: formation and oxidative cleavage of oxasilacyclohexanols
Source: Royal Society of Chemistry journal article supplement (doi:10.1039/b306922m), 2003-01-01
Supplement: b306922m.doc [file b306922m.doc]

**Supplementary data**

*2-[(3-Methylbut-2-enyl)di(*tert*-butyl)silanyloxy]-2-phenylethanol* (**1**)

Colourless oil (532 mg, 76%); *R*f 0.13 (10:1, petrol:ether); **max/cm–1 (film) 3434m br, 2932s, 2888s, 2858s, 1493w, 1472m, 1453m, 1388m, 1364m, 1308w, 1288w, 1206w, 1165m, 1101s, 1062s, 1029m, 1011m, 950m, 824s, 754m, 737m, 701s; **H(400 MHz, CDCl3) 0.92 (9 H, s, C(C*H*3)3), 1.08 (9 H, s, C(C*H*3)3), 1.58 (3 H, s, =C(C*H*3)2) overlaying 1.57–1.61 (2 H, m, SiC*H*2), 1.65 (3 H, d, *J* 2.0, =C(C*H*3)2), 1.96 (1 H, br t, *J* 5.6, O*H*), 3.61–3.71 (2 H, m, C*H*2OH), 4.92 (1 H, dd, *J* 6.1, 4.9, PhC*H*), 5.19–5.24 (1 H, m, C*H*=C), 7.37–7.30 (5 H, m, Ph); **C (100 MHz, CDCl3) 12.9, 17.6, 21.3, 21.6, 25.8, 28.1, 28.3, 69.1, 76.4, 120.1, 126.6, 127.8 (two peaks), 129.2, 141.7; *m/z* (CI+) 317 (7%), 296 (14), 279 (100), 240 (8), 176 (59), 134 (15), 92 (10); Accurate mass (ES–): Found 347.2421, C21H35O2Si (M – H+) requires 347.2406.

*2-[(3-Methylbut-2-enyl)di(isopropyl)silanyloxy]-2-phenylethanol* (**2**)

Colourless oil (259 mg, 40%); *R*f 0.65 (1:1, petrol:ether); **max/cm–1 (film) 3436m br, 3064w, 3030w, 2943s, 2867s, 1604w, 1493w, 1463m, 1455m, 1384w, 1246w, 1216w, 1160m, 1101s, 1061m, 1029m, 998w, 951m, 919w, 883m, 847m, 814w, 746m, 723w, 700s, 633w; **H(400 MHz, CDCl3) 0.92–1.03 (14 H, m, SiC*H*(C*H*3)2), 1.52 (2 H, apparent d, apparent *J* 7.6, SiC*H*2), 1.57 (3 H, d, *J* 0.8, =C(C*H*3)2), 1.65 (3 H, d, *J* 1.2, =C(C*H*3)2), 2.18 (1 H, t, *J* 6.6, O*H*), 3.59–3.62 (2 H, m, C*H*2OH), 4.83 (1 H, dd, *J* 6.4, 4.8, PhC*H*), 5.07–5.14 (1 H, m, C*H*=C), 7.25–7.39 (5 H, m, Ph); **C (100 MHz, CDCl3) 12.7, 12.9 (two peaks), 17.4 (two peaks), 17.5 (two peaks), 17.6, 25.8, 69.1, 76.0, 118.9, 126.4, 127.7, 128.2, 129.8, 141.5; *m/z* (CI+) 303 (MH+ – H­2O, 12%), 278 (18), 251 (98), 226 (24), 173 (27), 148 (100), 120 (18); Accurate mass (ES–): Found 319.2090, C19H31O2Si (M – H+) requires 319.2093.

*[(3-Methylbut-2-enyl)di(*tert*-butyl)silanyloxy]phenylacetaldehyde*(**3**)

On a 1.15 mmol scale this reaction gave a colourless oil (337 mg, 85%); *R*f 0.71 (1:1, petrol:ether); **max/cm–1 (film) 2933s, 2859s, 1736s, 1491w, 1473m, 1453m, 1388m, 1365m, 1287w, 1192m, 1117s, 1073m, 1028m, 1011m, 936w, 824s, 783w, 740m, 699s, 627m; **H(200 MHz, CDCl3) 1.03 (9 H, s, C(C*H*3)3), 1.18 (9 H, s, C(C*H*3)3), 1.65 (3 H, s, C*H*3), 1.68 (3 H, s, C*H*3), 1.73 (2 H, apparent d, apparent *J* 8.4, SiC*H*2), 5.19 (1 H, d, *J* 2.2, PhC*H*), 5.23–5.32 (1 H, m, C*H*=C), 7.41–7.48 (5 H, m, Ph), 9.57 (1 H, d, *J* 2.2, C*H*O); **C (50 MHz, CDCl3) 12.8, 18.0, 21.9, 22.0, 26.3, 28.4, 28.6, 81.2, 120.1, 127.0, 128.8, 129.2, 130.2, 137.4, 200.0; *m/z* (CI+) 347 (MH+, 13%), 335 (17), 317 (8), 277 (100), 265 (12), 176 (13); Accurate mass (CI+): Found 364.2671, C21H38NO2Si (MNH4+) requires 364.2672.

*[(3-Methylbut-2-enyl)di(isopropyl)silanyloxy]phenylacetaldehyde*(**4**)

On a 0.47 mmol scale this reaction gave a colourless oil (101 mg, 68%); *R*f 0.73 (1:1, petrol:ether); **max/cm–1 (film) 2936s, 2892s, 2859s, 1737s, 1493w, 1448m, 1447m, 1378m, 1292w, 1190m, 1117s, 1071m, 1027m, 931w, 844s, 739m, 698s; **H(200 MHz, CDCl3) 0.93–1.14 (14 H, m, SiC*H*(C*H*3)2), 1.60 (3 H, s, =C(C*H*3)2), 1.63 (2 H, apparent d, apparent *J* 7.6, SiC*H*2), 1.69 (3 H, s, =C(C*H*3)2), 5.11 (1 H, d, *J* 2.2, PhC*H*), 5.12–5.23 (1 H, m, C*H*=C), 7.38–7.50 (5 H, m, Ph), 9.56 (1 H, d, *J* 2.2, C*H*O); **C (50 MHz, CDCl3) 13.1, 17.9, 18.0, 26.2, 80.4, 118.8, 126.8, 128.8, 129.1, 129.5, 137.2, 200.1; *m/z* (CI+) 336 (MNH4+, 2%), 319 (MH+, 10), 249 (100), 237 (16); Accurate mass (CI+): Found 319.2090, C19H31O2Si (MH+) requires 319.2093.

*(3-Methylbut-2-enyl)di(isopropyl)silane* (**11**)

Prepared by methods analogous to those described for compound **10**. On a 5.86 mmol scale the stannane procedure gave **11** as a colourless oil (702 mg, 65%). On a 3.97 mmol scale the ozonolysis/Wittig olefination protocol furnished **11** (353 mg, 48%). *R*f 0.91 (petrol); **max (film)/cm–1 2925s, 2864s, 2098s, 1463s, 1377m, 1343w, 1244w, 1159m, 1098w, 1071w, 1003m, 918w, 882m, 857m, 828m, 804s, 730m, 696m, 648m; **H (400 MHz, CDCl3) 0.97–1.08 (14 H, m, 2SiC*H*(C*H*3)2), 1.51 (2 H, br d, *J* 8.3, SiC*H*2), 1.61 and 1.69 (2  3 H, 2s, =C(C*H*3)2), 3.42–3.45 (1 H, m, Si*H*), 5.20 (1 H, br t, *J* 8.3, C*H*=C(CH3)2); **C (100 MHz, CDCl3) 10.2, 10.6, 18.7, 18.9, 25.7, 120.2, 128.8; *m/z* (CI+) 202 (MNH4+, 100%), 185 (MH+, 9), 132 (24), 105 (28), 90 (11), 76 (16); Accurate mass (EI+): Found 184.1658, C11H24Si (M+) requires 184.1647.

*Tri(isopropyl)silanylacetaldehyde* (**21**)Error: Reference source not found

A solution of allyltri(isopropyl)silane (723 L, 3.0 mmol) in anhydrous dichloromethane (60 mL) was cooled to –78 °C. Ozone was passed through the solution until a blue colouration persisted; excess ozone was purged from the system with argon. Dimethyl sufide (264 L, 3.6 mmol) was added and the mixture stirred at –78 °C for 1 hr. and then warmed to room temperature over 16 hr. The mixture was partitioned between water (50 mL) and dichloromethane (50 mL). The aqueous phase was extracted with dichloromethane (225 mL), the combined organic layers washed with saturated aqueous NaCl solution (50 mL), dried (Na2SO4) and solvents removed *in vacuo*. Purification by flash column chromatography (19:1, petrol:ether  9:1, petrol:ether) gave aldehyde **21** as a colourless oil (372 mg, 61%) and tri(isopropyl)silanyloxyethene (122 mg, 20%; the yield of this by-product is variable). Data for **21**: *R*f 0.43 (9:1, petrol:ether); **max (film)/cm–1 2944m, 2892w, 2868m, 2713w, 1705s, 1466m, 1386w, 1368w, 1163w, 1130m, 1017w, 883m, 786w, 679m; **H (400 MHz, CDCl3) 1.00–1.10 (21 H, m, 3SiC*H*(C*H*3)2), 2.28 (2 H, d, *J* 4.4, SiC*H*2), 9.76 (1 H, t, *J* 4.4, C*H*O); **C (100 MHz, CDCl3) 11.3, 18.4, 33.0, 200.6; *m/z* (CI+) 218 (MNH4+, 24%), 201 (MH+, 100), 174 (45), 157 (12), 147 (11), 130 (43), 102 (16), 74 (12). Data for tri(isopropyl)silanyloxyethene: *R*f 0.73 (9:1, petrol:ether); **max (film)/cm–1 2944s, 2868s, 1465m, 1411w, 1382w, 1370m, 1320m, 1192m, 1107s, 1057s, 1019m, 1000m, 980m, 902w, 883m, 822w, 762w, 725w, 689w, 656w; **H (400 MHz, CDCl3) 0.01–1.10 (21 H, m, 3SiC*H*(C*H*3)2), 4.01 (1 H, d, *J* 5.6, CH=CH*H*E), 4.40 (1 H, d, *J* 12.4, CH=C*H*ZH), 6.48 (1 H, dd, *J* 12.4, 5.6, C*H*=CH2); **C (100 MHz, CDCl3) 11.4, 18.5, 94.2, 148.2; *m/z* (CI+) 218 (MNH4+, 22%), 201 (MH+, 100), 174 (37), 147 (11), 130 (22), 102 (12), 74 (13).

*Diphenyl(prop-2-enyl)silane* (**24**)[[1]](#endnote-2)

Prepared by a method analogous to that described for compound **23**. On a 5.11 mmol scale the reaction gave silane **24** as a colourless oil (1.13 g, 99%). *R*f 0.40 (petrol); **max (film)/cm–1 3135w, 3069s, 3051s, 3000s, 2973m, 2917w, 2885w, 2125s, 1956w, 1884w, 1818w, 1766w, 1630s, 1589m, 1568w, 1486m, 1428s, 1391m, 1329w, 1302w, 1264w, 1190m, 1155m, 1116s, 1066w, 1041w, 991m, 929m, 899m, 807s, 697s, 586s; **H (400 MHz, CDCl3) 2.27 (2 H, ddt, *J* 8.0, 3.4, 1.2, SiC*H*2), 5.00 (1 H, t, *J* 3.4, Si*H*), 5.02 (1 H, ddt, *J* 10.4, 2.0, 1.2, CH=CH*H*E), 5.08 (1 H, ddt, *J* 17.2, 2.0, 1.2, CH=C*H*ZH), 5.97 (1 H, ddt, *J* 17.2, 10.4, 8.0, C*H*=CH2), 3.71–7.78 (6 H, m, Ph), 3.82–3.86 (4 H, m, Ph); **C (100 MHz, CDCl3) 19.9, 114.9, 128.1, 129.8, 133.7, 133.8, 135.3; *m/z* (CI+) 242 (MNH4+, 100%), 200 (82), 183 (14); Accurate mass (CI+): Found 242.1369, C15H20NSi (MNH4+) requires 242.1365.

*(Cyclohexyloxy)di(isopropyl)prop-2-enylsilane* (**25**)

To a stirred solution of di(isopropyl)dichlorosilane (722 L, 4.0 mmol) in anhydrous tetrahydrofuran (20 mL) cooled to –78 °C was added allylmagnesium bromide (1.0 M in ether, 3.2 mL, 3.2 mmol) dropwise over 5 min. The reaction mixture was stirred for 2 hr. at –78 °C and then warmed to room temperature and tetrahydrofuran removed *in vacuo*. The residue was taken up in anhydrous dimethylformamide (12 mL) and treated with imidazole (327 mg, 4.8 mmol), 4-dimethylaminopyridine (24 mg, 0.2 mmol) and cyclohexanol (333 L, 3.2 mmol). The mixture was heated at 80 °C for 4 hr., cooled to room temperature and poured into saturated aqueous NH4Cl solution (25 mL). The aqueous phase was separated and extracted with ether (325 mL); the combined organic fractions were washed with saturated aqueous NaCl solution (225 mL), dried (MgSO4) and solvents removed *in vacuo*. The resulting yellow oil was purified by flash column chromatography (petrol) to furnish silane **25** as a colourless oil (555 mg, 69%). *R*f 0.80 (2:1, petrol:ether); **max (film)/cm–1 3078w, 2934s, 2865s, 1630m, 1464m, 1372m, 1245w, 1155m, 1134m, 1100s, 1053m, 1020m, 997m, 932w, 884m, 859m, 821m, 782m, 746m; **H (400 MHz, CDCl3) 0.95–1.09 (14 H, m, 2SiC*H*(C*H*3)2), 1.16–1.39 (5 H, m, 2C*H*2 and C*H*), 1.46–1.52 (1 H, m, C*H*), 1.72 (2 H, dt, *J* 8.4, 1.2, SiC*H*2), 1.69–1.83 (4 H, m, 2C*H*2), 3.66 (1 H, tt, *J* 9.0, 3.6, OC*H*), 4.85 (1 H, ddt, *J* 10.0, 2.4, 1.2, CH=CH*H*E), 4.95 (1 H, ddt, *J* 16.8, 2.4, 1.2, CH=C*H*ZH), 5.88 (1 H, ddt, *J* 16.8, 10.0, 8.4, C*H*=CH2); **C (100 MHz, CDCl3) 12.8, 17.5, 17.6, 19.3, 24.0, 25.6, 35.9, 70.8, 113.3, 134.9; *m/z* (CI+) 255 (MH+, 4%), 230 (100), 213 (79), 148 (25); Accurate mass (CI+): Found 255.2139, C15H31OSi (MH+) requires 255.2144.

*(Cyclohexyloxy)di(isopropyl)-3-methylbut-2-enylsilane* (**26**)

A stirred solution of silane **25** (240 mg, 0.94 mmol) in anhydrous dichloromethane (20 mL) was cooled to –78 °C. Ozone was passed through the solution until a blue colouration persisted; excess ozone was purged from the system with argon. Dimethyl sufide (83 L, 1.13 mmol) was added and the reaction mixture stirred at –78 °C for 2 hr. and then warmed to room temperature over 1 hr. Meanwhile, to a suspension of isopropyltriphenylphosphonium iodide (1.63 g, 3.77 mmol) in anhydrous tetrahydrofuran (15 mL) cooled to –45 °C was added BuLi (1.6 M in hexanes, 2.06 mL, 3.3 mmol). The blood red solution was warmed to room temperature over 2 hr. Both solutions were cooled to –45 °C and the ylid added *via* cannula to the solution of silylacetaldehyde. The solution was stirred at –45 °C for 30 min. and then warmed to room temperature over 3 hr. The reaction mixture was partitioned between water (50 mL) and dichloromethane (50 mL). The aqueous phase was extracted with dichloromethane (325 mL), the combined organic layers were washed with saturated aqueous NaCl solution (50 mL), dried (Na2SO4) and solvents removed *in vacuo*. The crude residue was triturated with ether and petrol, the extracts filtered through Celite® and the solvents removed *in vacuo*. The resulting yellow oil was purified by flash column chromatography (29:1, petrol:ether) to furnish silane **26** as a colourless oil (131 mg, 50%). *R*f 0.68 (29:1, petrol:ether); **max (film)/cm–1 2933s, 2865s, 1464m, 1450m, 1374w, 1245w, 1153w, 1099s, 1052m, 1020w, 998m, 919w, 883m, 859m, 824w, 781w, 742m, 720w; **H (400 MHz, CDCl3) 0.90–1.05 (14 H, m, 2SiC*H*(C*H*3)2), 1.16–1.38 (5 H, m, 2C*H*2 and C*H*), 1.46–1.53 (1 H, m, C*H*), 1.56 (2 H, d, *J* 8.0, SiC*H*2), 1.63 and 1.68 (2  3 H, 2s, =C(C*H*3)2), 1.70–1.82 (4 H, m, 2C*H*2), 3.65 (1 H, tt, *J* 8.8, 4.0, OC*H*), 5.21 (1 H, br t, *J* 8.0, C*H*=C(CH3)2); **C (100 MHz, CDCl3) 12.9, 17.5, 17.6, 24.1, 25.6, 25.9, 36.0, 70.9, 119.9, 128.8; *m/z* (CI+) 283 (MH+, 8%), 230 (100), 213 (18), 148 (14); Accurate mass (CI+): Found 283.2454, C17H35OSi (MH+) requires 283.2457.

*(*S*)-Ethyl [(3-methylbut-2-enyl)di(isopropyl)silanyloxy]phenylacetate*(**29**)

A solution of allylsilane **28** (214 mg, 0.64 mmol) and Sudan Red 7B indicator (5 L, 0.05% solution in dichloromethane) in anhydrous dichloromethane (13 mL) was cooled to –78 °C. Ozone was passed through the solution until the magenta colouration dispersed; excess ozone was purged from the system with argon. Dimethyl sufide (56 L, 0.76 mmol) was added and the mixture was stirred at –78 °C for 1 hr. and then warmed to room temperature over 30 min. Meanwhile, to a suspension of isopropyltriphenylphosphonium iodide (1.10 g, 2.54 mmol) in anhydrous tetrahydrofuran (10 mL) cooled to –45 °C was added BuLi (2.5M in hexanes, 916 L, 2.29 mmol). The blood red solution was stirred for 30 min. at –45 °C then warmed to room temperature over 1 hr. Both solutions were cooled to –45 °C and the ylid added *via* cannula to the solution of silylacetaldehyde. The solution was stirred at –45 °C for 30 min. and then warmed to room temperature over 2.5 hr. The mixture was partitioned between water (50 mL) and dichloromethane (50 mL). The aqueous phase was extracted with dichloromethane (225 mL), the combined organic layers were washed with saturated aqueous NaCl solution (250 mL), dried (Na2SO4) and solvents removed *in vacuo*. The crude residue was triturated with ether and petrol; the combined extracts were filtered through Celite® and the solvent removed *in vacuo*. The resulting yellow oil was purified by flash column chromatography (29:1, petrol:ether) to furnish ester **29** as a colourless oil (41.3 mg, 18%). *R*f 0.27 (29:1, petrol:ether); []D22 +20.5 (*c* 1.01 in CHCl3); **max (film)/cm–1 3032w, 2943s, 2867s, 1757s, 1733s, 1495w, 1464m, 1454m, 1369w, 1262m, 1133s, 1071m, 1029m, 999w, 949w, 918w, 883m, 834m; **H (400 MHz, CDCl3) 0.95–1.08 (14 H, m, 2SiC*H*(C*H*3)2), 1.22 (3 H, t, *J* 7.2, OCH2C*H*3), 1.56 and 1.63 (2  3 H, 2s, =C(C*H*3)2), 1.59 (2 H, apparent d, apparent *J* 8.2, SiC*H*2), 4.10–4.18 (2 H, m, OC*H*2CH3), 5.12 (1 H, br t, *J* 8.2, C*H*=C(CH3)2), 5.28 (1 H, s, C*H*Ph), 7.27–7.36 (3 H, m, Ph), 7.49–7.52 (2 H, m, Ph); **C (100 MHz, CDCl3) 12.4, 12.5, 12.6, 14.1, 17.1–17.6 (overlapping peaks), 25.8, 61.0, 74.4, 118.6, 126.3, 128.0, 128.2, 129.7, 139.4, 172.1; *m/z* (CI+) 380 (MNH4+, 16%), 293 (100), 91 (27); Accurate mass (CI+): Found 380.2624, C21H38NO3Si (MNH4+) requires 380.2621.

1. Kim, C.; Choi, S. K.; Park, E.; Jung, I. *J. Korean Chem. Soc.,* **1997,** *41,* 88–97. [↑](#endnote-ref-2)
